# Supplementary material for: A dynamic stretchable and self-healable supercapacitor with a CNT/graphene/PANI composite film
Source: Royal Society of Chemistry journal article supplement (doi:10.1039/c8nr07991a), 2018-01-01
Supplement: c8nr07991a1.pdf [file c8nr07991a1.pdf]

*Supporting information*

**Dynamic stretchable and self-healable supercapacitor with  
CNT/graphene/PANI composite film**

*Lei Zhao,<sup>#</sup> Xiao Liang,<sup>#</sup> Ma, Yun, Zhang, Daohong, Qiufan Wang,<sup>\*</sup>*

Ma, Yun

Key Laboratory of Catalysis and Materials Science of the State Ethnic Affairs Commission and  
Ministry of Education, South-Central University for Nationalities, Wuhan, Hubei Province,  
430074, P. R. China. E-mail: ygdf@mail.scuec.edu.com

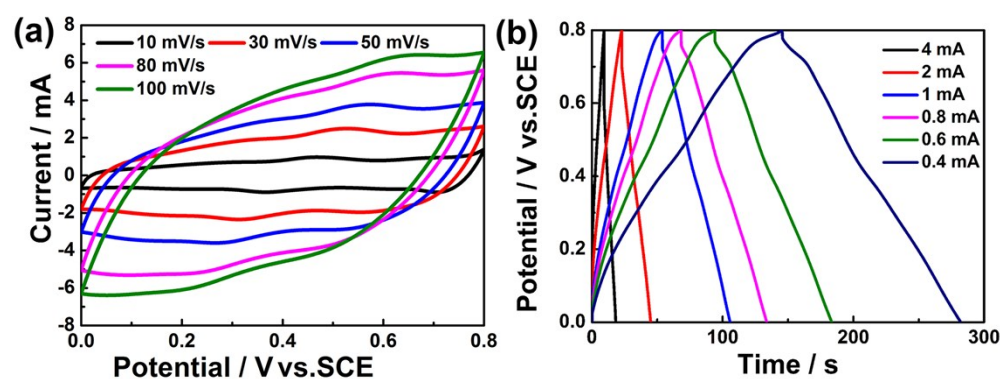

**Figure S1.** Electrochemical properties of CNT@PANI film electrode.

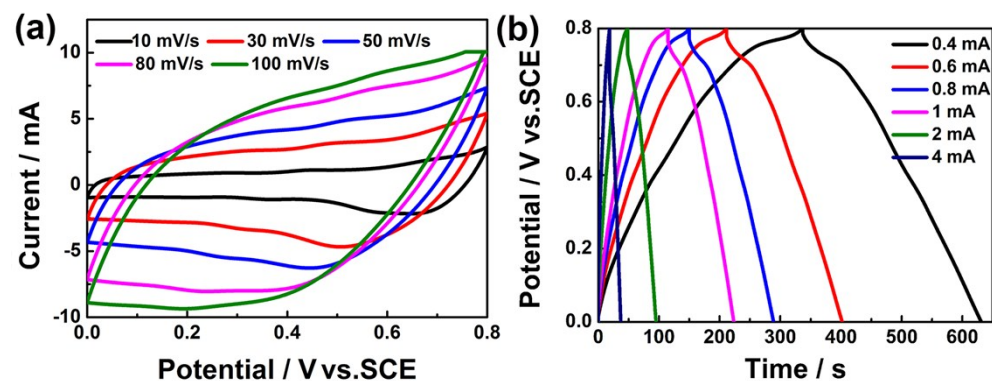

**Figure S2.** Electrochemical properties of CNT@graphene@PANI-1 film electrode.

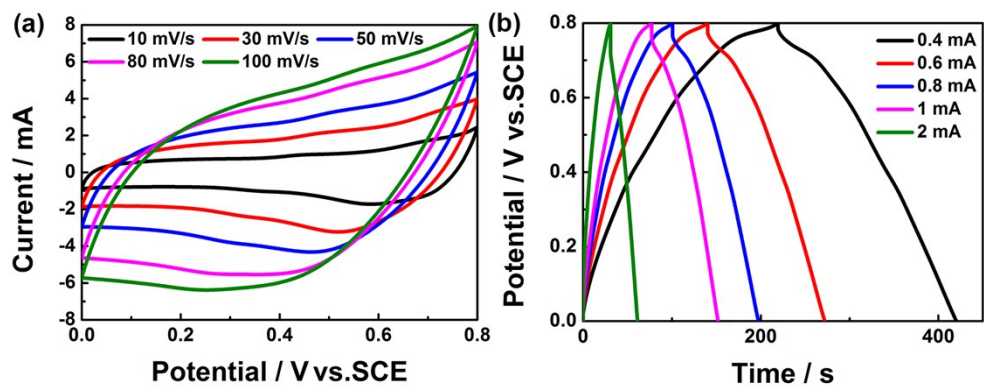

**Figure S3.** Electrochemical properties of CNT@graphene@PANI-2 film electrode.

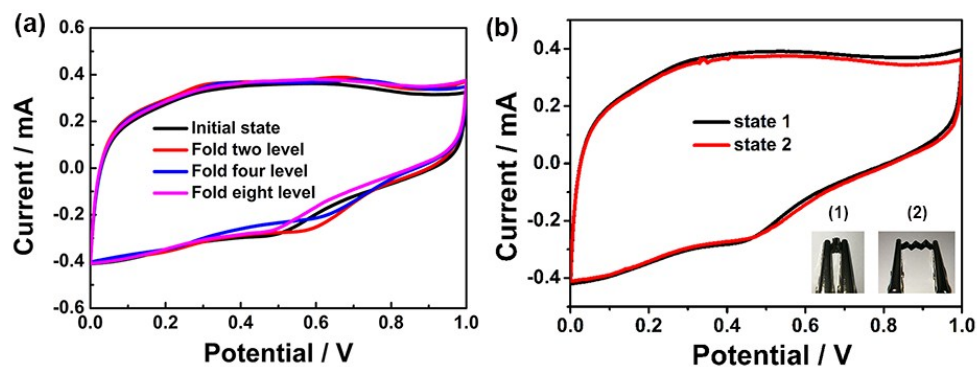

**Figure S4.** Electrochemical properties of CNT@PANI-based supercapacitor under different folding levels and folding states.
